# Supplementary material for: Identifying clinical features in primary care electronic health record studies: methods for codelist development
Source: PubMed Central journal article supplement (PMC5719324; doi:10.1136/bmjopen-2017-019637), 2017-11-22
Supplement: bmjopen-2017-019637supp001.pdf [file bmjopen-2017-019637supp001.pdf]

## Online only supplementary material

Table A 1 List of potential codes for inclusion in a list to identify patients with shortness of breath. 'sob' is the binary variable denoting shortness of breath (1: include; 0: exclude)

| medcode | desc                           | sob | Reason for exclusion                           |
|---------|--------------------------------|-----|------------------------------------------------|
| 735     | [D]Breathlessness              | 1   |                                                |
| 741     | [D]Shortness of breath         | 1   |                                                |
| 820     | [D]Tachypnoea                  | 0   | Abnormally rapid breathing, not breathlessness |
| 982     | [D]Apnoea                      | 0   | Absence of breathing, not breathlessness       |
| 1429    | Breathlessness                 | 1   |                                                |
| 2506    | [D]Sleep apnoea syndrome       | 0   | Absence of breathing, not breathlessness       |
| 2563    | [D]Respiratory distress        | 1   |                                                |
| 2575    | Short of breath on exertion    | 1   |                                                |
| 2737    | Respiratory distress syndrome  | 1   |                                                |
| 2931    | Difficulty breathing           | 1   |                                                |
| 3007    | Newborn transitory tachypnoea  | 0   | Abnormally rapid breathing, not breathlessness |
| 3092    | [D]Dyspnoea                    | 1   |                                                |
| 4822    | Shortness of breath            | 1   |                                                |
| 5175    | Breathlessness symptom         | 1   |                                                |
| 5349    | Shortness of breath symptom    | 1   |                                                |
| 5896    | Dyspnoea - symptom             | 1   |                                                |
| 6326    | Breathless - moderate exertion | 1   |                                                |

|              |                                   |   |                                                |
|--------------|-----------------------------------|---|------------------------------------------------|
| <b>6434</b>  | Paroxysmal nocturnal dyspnoea     | 1 |                                                |
| <b>7000</b>  | O/E - dyspnoea                    | 1 |                                                |
| <b>7534</b>  | O/E - respiratory distress        | 1 |                                                |
| <b>7603</b>  | Sleep apnoea                      | 0 | Absence of breathing                           |
| <b>7683</b>  | Breathless - lying flat           | 1 |                                                |
| <b>7932</b>  | Breathless - mild exertion        | 1 |                                                |
| <b>8148</b>  | Obstructive sleep apnoea          | 0 | Absence of breathing                           |
| <b>9089</b>  | Orthopnoea symptom                | 1 |                                                |
| <b>9297</b>  | [D]Respiratory insufficiency      | 1 |                                                |
| <b>10114</b> | O/E - tachypnoea                  | 0 | Abnormally rapid breathing, not breathlessness |
| <b>11451</b> | [D]Orthopnoea                     | 1 |                                                |
| <b>12474</b> | SOBOE                             | 1 |                                                |
| <b>18116</b> | Nocturnal dyspnoea                | 1 |                                                |
| <b>19346</b> | No breathlessness                 | 0 | Negation of breathlessness                     |
| <b>19426</b> | MRC Breathlessness Scale: grade 3 | 1 |                                                |
| <b>19427</b> | MRC Breathlessness Scale: grade 2 | 1 |                                                |
| <b>19429</b> | MRC Breathlessness Scale: grade 5 | 1 |                                                |
| <b>19430</b> | MRC Breathlessness Scale: grade 4 | 1 |                                                |
| <b>19432</b> | MRC Breathlessness Scale: grade 1 | 1 |                                                |
| <b>19576</b> | Apnoea of newborn                 | 0 | Absence of breathing                           |
| <b>20438</b> | [D]Syndrome sleep apnoea          | 0 | Absence of breathing                           |
| <b>20748</b> | Obstructive sleep apnoea          | 0 | Absence of breathing                           |
| <b>21801</b> | Breathlessness NOS                | 1 |                                                |

|              |                                         |   |                                                           |
|--------------|-----------------------------------------|---|-----------------------------------------------------------|
| <b>22094</b> | Short of breath dressing/undressing     | 1 |                                                           |
| <b>23779</b> | Sleep apnoea                            | 0 | Absence of breathing                                      |
| <b>23924</b> | Scoline apnoea                          | 0 | Absence of breathing                                      |
| <b>24848</b> | Adult respiratory distress syndrome     | 1 |                                                           |
| <b>24889</b> | Breathless - strenuous exertion         | 1 |                                                           |
| <b>26684</b> | Perinatal respiratory distress NOS      | 0 | Related to pregnancy not pathology                        |
| <b>26871</b> | Primary sleep apnoea of newborn         | 0 | Absence of breathing                                      |
| <b>31143</b> | Breathless - at rest                    | 1 |                                                           |
| <b>31913</b> | O/E - hyperpnoea                        | 0 | Increased depth and rate of breathing, not breathlessness |
| <b>36301</b> | [D]Hypersomnia with sleep apnoea        | 0 | Absence of breathing                                      |
| <b>37667</b> | Apnoea alarm monitoring                 | 0 | Absence of breathing                                      |
| <b>37704</b> | O/E - orthopnoea                        | 1 |                                                           |
| <b>42287</b> | Borg Breathlessness Score: 6 severe (+) | 1 |                                                           |
| <b>48539</b> | [D]Insomnia with sleep apnoea           | 0 | Absence of breathing                                      |
| <b>53771</b> | Dyspnoea on exertion                    | 1 |                                                           |
| <b>54594</b> | [M]Mesoblastic nephroma                 | 0 | Contains 'sob' string, but is inappropriate               |
| <b>57193</b> | Borg Breathlessness Score: 3 moderate   | 1 |                                                           |
| <b>57283</b> | Introduction of transobturator tape     | 0 | Contains 'sob' string, but is inappropriate               |

|              |                                                              |   |                                             |
|--------------|--------------------------------------------------------------|---|---------------------------------------------|
| <b>57678</b> | Adult respiratory distress syndrome                          | 1 |                                             |
| <b>57759</b> | Borg Breathlessness Score: 2 slight                          | 1 |                                             |
| <b>57903</b> | CLASP shortness of breath score                              | 1 |                                             |
| <b>58538</b> | Fusobacterial necrotising tonsillitis                        | 0 | Contains 'sob' string, but is inappropriate |
| <b>59860</b> | Borg Breathlessness Score: 4 somewhat severe                 | 1 |                                             |
| <b>60096</b> | CLASP shortness of breath score                              | 1 |                                             |
| <b>64049</b> | Borg Breathlessness Score: 5 severe                          | 1 |                                             |
| <b>65353</b> | Borg Breathlessness Score: 0 none at all                     | 0 | Negates breathlessness                      |
| <b>67566</b> | Borg Breathlessness Score: 9 very, very sev (almost maximal) | 1 |                                             |
| <b>68707</b> | Borg Breathlessness Score: 1 very slight                     | 1 |                                             |
| <b>70061</b> | Borg Breathlessness Score: 7 very severe                     | 1 |                                             |
| <b>70818</b> | Borg Breathlessness Score: 0.5 very, very slight             | 1 |                                             |
| <b>72334</b> | Borg Breathlessness Score: 8 very severe (+)                 | 1 |                                             |
| <b>72704</b> | [X]Other respiratory distress of newborn                     | 0 | Newborn                                     |

|               |                                          |    |                                             |
|---------------|------------------------------------------|----|---------------------------------------------|
| <b>73978</b>  | [X]Other apnoea of newborn               | 0  | Absence of breathing, not breathlessness    |
| <b>93869</b>  | Removal of transobturator tape           | 0  | Contains 'sob' string, but is inappropriate |
| <b>97037</b>  | Introduction of transobturator sling     | 0  | Contains 'sob' string, but is inappropriate |
| <b>98965</b>  | Urine beta amino isobutyrate level       | 0  | Contains 'sob' string, but is inappropriate |
| <b>100177</b> | Berlin questionnaire for sleep apnoea    | 0  | Related to absence of breathing             |
| <b>101843</b> | Borg Breathlessness Score: 10<br>maximal | 1  |                                             |
| <b>Total</b>  |                                          | 78 |                                             |

Table A 2 Delphi review of codes for shortness of breath. 1: definitely include; 2: uncertain; 3: definitely exclude

| medcode | desc                           | Reviewer 1 Decision | Reviewer 1 comment | Reviewer 2 decision | Reviewer 2 comment                             |
|---------|--------------------------------|---------------------|--------------------|---------------------|------------------------------------------------|
| 735     | [D]Breathlessness              | 1                   |                    | 1                   |                                                |
| 741     | [D]Shortness of breath         | 1                   |                    | 1                   |                                                |
| 1429    | Breathlessness                 | 1                   |                    | 1                   |                                                |
| 2563    | [D]Respiratory distress        | 1                   |                    | 2                   | I would usually only use this term in children |
| 2575    | Short of breath on exertion    | 1                   |                    | 1                   |                                                |
| 2737    | Respiratory distress syndrome  | 1                   |                    | 2                   | I would usually only use this term in children |
| 2931    | Difficulty breathing           | 1                   |                    | 1                   |                                                |
| 3092    | [D]Dyspnoea                    | 1                   |                    | 1                   |                                                |
| 4822    | Shortness of breath            | 1                   |                    | 1                   |                                                |
| 5175    | Breathlessness symptom         | 1                   |                    | 1                   |                                                |
| 5349    | Shortness of breath symptom    | 1                   |                    | 1                   |                                                |
| 5896    | Dyspnoea - symptom             | 1                   |                    | 1                   |                                                |
| 6326    | Breathless - moderate exertion | 1                   |                    | 1                   |                                                |
| 6434    | Paroxysmal nocturnal dyspnoea  | 1                   |                    | 1                   |                                                |
| 7000    | O/E - dyspnoea                 | 1                   |                    | 1                   |                                                |
| 7534    | O/E - respiratory distress     | 1                   |                    | 2                   |                                                |
| 7683    | Breathless - lying flat        | 1                   |                    | 1                   |                                                |
| 7932    | Breathless - mild exertion     | 1                   |                    | 1                   |                                                |
| 9089    | Orthopnoea symptom             | 1                   |                    | 1                   |                                                |
| 9297    | [D]Respiratory insufficiency   | 1                   |                    | 2                   |                                                |

|              |                                            |   |  |   |                                                                                                  |
|--------------|--------------------------------------------|---|--|---|--------------------------------------------------------------------------------------------------|
| <b>11451</b> | [D]Orthopnoea                              | 1 |  | 1 |                                                                                                  |
| <b>12474</b> | SOBOE                                      | 1 |  | 1 |                                                                                                  |
| <b>18116</b> | Nocturnal dyspnoea                         | 1 |  | 1 |                                                                                                  |
| <b>19426</b> | MRC Breathlessness Scale:<br>grade 3       | 1 |  | 1 |                                                                                                  |
| <b>19427</b> | MRC Breathlessness Scale:<br>grade 2       | 1 |  | 1 |                                                                                                  |
| <b>19429</b> | MRC Breathlessness Scale:<br>grade 5       | 1 |  | 1 |                                                                                                  |
| <b>19430</b> | MRC Breathlessness Scale:<br>grade 4       | 1 |  | 1 |                                                                                                  |
| <b>19432</b> | MRC Breathlessness Scale:<br>grade 1       | 1 |  | 1 |                                                                                                  |
| <b>21801</b> | Breathlessness NOS                         | 1 |  | 1 |                                                                                                  |
| <b>22094</b> | Short of breath<br>dressing/undressing     | 1 |  | 1 |                                                                                                  |
| <b>24848</b> | Adult respiratory distress<br>syndrome     | 1 |  | 2 |                                                                                                  |
| <b>24889</b> | Breathless - strenuous<br>exertion         | 1 |  | 1 |                                                                                                  |
| <b>31143</b> | Breathless - at rest                       | 1 |  | 1 |                                                                                                  |
| <b>37704</b> | O/E - orthopnoea                           | 1 |  | 1 |                                                                                                  |
| <b>42287</b> | Borg Breathlessness Score: 6<br>severe (+) | 1 |  | 1 | I would never use this scale and not sure who would but if it is coded then it would be relevant |
| <b>53771</b> | Dyspnoea on exertion                       | 1 |  | 1 |                                                                                                  |
| <b>57193</b> | Borg Breathlessness Score: 3<br>moderate   | 1 |  | 1 |                                                                                                  |
| <b>57678</b> | Adult respiratory distress<br>syndrome     | 1 |  | 1 |                                                                                                  |
| <b>57759</b> | Borg Breathlessness Score: 2<br>slight     | 1 |  | 1 |                                                                                                  |

|               |                                                              |   |  |   |          |
|---------------|--------------------------------------------------------------|---|--|---|----------|
| <b>57903</b>  | CLASP shortness of breath score                              | 1 |  | 1 | as above |
| <b>59860</b>  | Borg Breathlessness Score: 4 somewhat severe                 | 1 |  | 1 |          |
| <b>60096</b>  | CLASP shortness of breath score                              | 1 |  | 1 |          |
| <b>64049</b>  | Borg Breathlessness Score: 5 severe                          | 1 |  | 1 |          |
| <b>67566</b>  | Borg Breathlessness Score: 9 very, very sev (almost maximal) | 1 |  | 1 |          |
| <b>68707</b>  | Borg Breathlessness Score: 1 very slight                     | 1 |  | 1 |          |
| <b>70061</b>  | Borg Breathlessness Score: 7 very severe                     | 1 |  | 1 |          |
| <b>70818</b>  | Borg Breathlessness Score: 0.5 very, very slight             | 1 |  | 1 |          |
| <b>72334</b>  | Borg Breathlessness Score: 8 very severe (+)                 | 1 |  | 1 |          |
| <b>101843</b> | Borg Breathlessness Score: 10 maximal                        | 1 |  | 1 |          |



Table A 3 Sensitivity analysis: Medical codes used to record shortness of breath in a group of patients in the year before they were diagnosed with lung cancer

| medcode      | Description                       | Frequency | Percent | Cum.  |
|--------------|-----------------------------------|-----------|---------|-------|
| <b>4822</b>  | Shortness of breath               | 3,226     | 24.66   | 24.66 |
| <b>741</b>   | [D]Shortness of breath            | 1,455     | 11.12   | 35.78 |
| <b>1429</b>  | Breathlessness                    | 1,116     | 8.53    | 44.32 |
| <b>19427</b> | MRC Breathlessness Scale: grade 2 | 1,106     | 8.46    | 52.77 |
| <b>19426</b> | MRC Breathlessness Scale: grade 3 | 1,010     | 7.72    | 60.49 |
| <b>5349</b>  | Shortness of breath symptom       | 816       | 6.24    | 66.73 |
| <b>5175</b>  | Breathlessness symptom            | 785       | 6.00    | 72.73 |
| <b>19430</b> | MRC Breathlessness Scale: grade 4 | 764       | 5.84    | 78.57 |
| <b>5896</b>  | Dyspnoea - symptom                | 437       | 3.34    | 81.91 |
| <b>2575</b>  | Short of breath on exertion       | 415       | 3.17    | 85.09 |
| <b>3092</b>  | [D]Dyspnoea                       | 395       | 3.02    | 88.10 |
| <b>19432</b> | MRC Breathlessness Scale: grade 1 | 332       | 2.54    | 90.64 |
| <b>6326</b>  | Breathless - moderate exertion    | 261       | 2.00    | 92.64 |
| <b>19429</b> | MRC Breathlessness Scale: grade 5 | 189       | 1.44    | 94.08 |
| <b>2931</b>  | Difficulty breathing              | 187       | 1.43    | 95.51 |
| <b>12474</b> | SOBOE                             | 166       | 1.27    | 96.78 |
| <b>7932</b>  | Breathless - mild exertion        | 142       | 1.09    | 97.87 |
| <b>735</b>   | [D]Breathlessness                 | 66        | 0.50    | 98.37 |
| <b>7000</b>  | O/E - dyspnoea                    | 49        | 0.37    | 98.75 |
| <b>57903</b> | CLASP shortness of breath score   | 44        | 0.34    | 99.08 |
| <b>31143</b> | Breathless - at rest              | 39        | 0.30    | 99.38 |

|               |                                         |        |        |        |
|---------------|-----------------------------------------|--------|--------|--------|
| <b>7683</b>   | Breathless - lying flat                 | 22     | 0.17   | 99.55  |
| <b>6434</b>   | Paroxysmal nocturnal dyspnoea           | 19     | 0.15   | 99.69  |
| <b>21801</b>  | Breathlessness NOS                      | 10     | 0.08   | 99.77  |
| <b>11451</b>  | [D]Orthopnoea                           | 9      | 0.07   | 99.84  |
| <b>9089</b>   | Orthopnoea symptom                      | 8      | 0.06   | 99.90  |
| <b>24889</b>  | Breathless - strenuous exertion         | 5      | 0.04   | 99.94  |
| <b>18116</b>  | Nocturnal dyspnoea                      | 3      | 0.02   | 99.96  |
| <b>53771</b>  | Dyspnoea on exertion                    | 2      | 0.02   | 99.98  |
| <b>22094</b>  | Borg Breathlessness Score: 10 maximal   | 1      | 0.01   | 99.98  |
| <b>59860</b>  | Borg Breathlessness Score: 4 somewhat.. | 1      | 0.01   | 99.99  |
| <b>101843</b> | Short of breath dressing/undressing     | 1      | 0.01   | 100.00 |
|               |                                         |        |        |        |
| <b>Total</b>  | Total                                   | 13,081 | 100.00 |        |

Example R syntax.

Credit: Ben Feakins ([Benjamin.Feakins@phc.ox.ac.uk](mailto:Benjamin.Feakins@phc.ox.ac.uk)).

```
#=====#
#           #
#### R CODE FOR APPENDIX ####
#           #
#=====#

### Set Directory Objects ###
browser.dir <- "/Volumes/PHC/CPRD_data/Browsers"
save.dir <- "~/Desktop"

### Read Data Into R ###
setwd(browser.dir)
medical <- read.delim("medical.txt", header = FALSE,
na.strings = "", stringsAsFactors = FALSE, skip = 1)
names(medical) <- c("medcode", "readcode",
"clinicalevents", "immunisationevents",
"referralevents", "testevents", "readterm",
"databasebuild") # Define headers.

### Define Search Terms ###
search.terms.general <- c("shortness of
breath|sob|pnoea|pnea|puffed|short of
breath|winded|breathless")
search.terms.breath <- c("breath")
search.terms.breath.resid <-
c("short|difficult|labour|labor|distress|insuff")
search.terms.respir <- c("respir")
search.terms.respir.resid <- c("insuff|distress")

### Filtering ###
general <- medical[grepl(search.terms.general,
medical$readterm, ignore.case = TRUE), ]
breath <- medical[grepl(search.terms.breath,
medical$readterm, ignore.case = TRUE), ]
breath <- breath[grepl(search.terms.breath.resid,
breath$readterm, ignore.case = TRUE), ]
respir <- medical[grepl(search.terms.respir,
medical$readterm, ignore.case = TRUE), ]
```

```
respir <- respir[grepl(search.terms.respir.resid,
respir$readterm, ignore.case = TRUE), ]

### Combine Results ###
medcodes <- rbind(general, breath, respir)

### De-Duplicate ###
medcodes <- unique(medcodes)

### Sort ###
medcodes <- medcodes[order(medcodes$medcode), ]

### Remove Codes Not Related to Breathlessness ###
# Further subsetting using grepl().

### Drop Useless Variables ###
medcodes <- medcodes[c("medcode", "readcode")]

### Save a Copy ###
setwd(save.dir)
write.table(medcodes, "sob_library.txt", quote = FALSE,
sep = "\t", na = "", row.names = FALSE)

### Tidying Up ###
rm(browser.dir, save.dir)
rm(search.terms.general, search.terms.breath,
search.terms.breath.resid, search.terms.respir,
search.terms.respir.resid)
rm(medical, general, breath, respir)
rm(medcodes)
```
